# Supplementary material
Source: publisher figshare collection journal article supplement (https://frontiersin.figshare.com/ndownloader/files/37614446)
Supplement: Supplementary file 1 [file 37614446]

## Sheet: Sheet1
>SmMAPK12a
MCLCRITRSPPPGEQKRRTDGDRQARCRSADKRNKKCVCCSTSFSALDSRTGAKVAIKKLYRPFQSELFAKRAYRELRLLKHMKHESVIGLLDVFTADLSLDRFHDFYLVMPFMGTDLGKLMKLQKLSEEKIQYLVYQMLKGLKYIHSAGIIHRDLKPGNLAINQDCELKILDFGLARQTDSEMTGYVVTRWYRAPEVILSWMHYTQTVDIWSVGCIMAEMLQGKPLFKGSDHLDQLTEIMKITGKPTPEFTSKLISEDAKSYIKSLPKLEKKDLHTVFSTTNPQAVSVLERMFLLDPESRATAAEALALPYFTEFREPEEETEAQPYDHSLDHTEQSLNQWKRHTFTEILSFKPVVPESKETSL
>SmMAPK12b
MAVRSRTGFFRQEVNRTAWEVPERYRDLKQAGTGAYGTVCSAWDRRTGAQVAIKKLHRPFQSKLFAKRAYRELRLLKHMRHENVIGLLDVFTAEISLDRLRDFYLVMPFMGTDLGKLMKLERLSEDRVQFLVYQMMRGLKYIHSAGIIHRDLKPGNLAINPDCELKILDFGLARQADAEMTGYVVTRWYRAPEVILNWMHYTQTVDIWSAGCIMAEMLLGKPLFKGSDHLDQLREIMKITGTPSGDFVVKLQSQDAKNYIRSLPKVLKKDLHAVFSKASSSAVCVLEKMLLLDPERRVSASEALDLPFFGEFRDTEEETEALPYDQTMDNTDLPLDQWKRHTFTEILTFRPNKDSKETSL
>SmMAPK13
MEARAHFSREEINSTVWEVPEKFTRLKQIGTGAYGSVCSTINEKTAEKVAIKKLHRPFQSEIFAKRAYRELRLLKHMKHENVIGLLDVFTPASGFDDFQDFYLVMPYMFTDLSKVRGHLSEDKVKFLVYQMLCGLRYIHKAGIIHRDLKPGNLAVNQDCELKILDFGLARGADAEMTGYVVTRWYRAPEVILNWMHYTQTVDLWSVGCIMAEMINGKTLFKGKDYMDQLTQIMKVTGVPGPEFVQKLDSPEARNYVKALPRYPRKDFSTLFPRASANGIDLLEKMLVLDGDERLTAELALEHPYFDGLRDPDDFPEPAPYDDSHDNAALTLDEWKRLCFKEVKSFVPFPRRDSKRRNTLTMSS
>SmMAPK11
MSARPGFYRQELNKTVWEVPERYQNLTPVGSGAYGSVCSAYDVVSRQKVAVKKLSRPFQSLIHSRRSYRELRLLKHMKHENVIGLLDVFTPAATLEDFNELYLVTNLMGADLNNIVKFQRLSDEHVQFLIYQLLRGLKYIHSAGLIHRDLKPSNVAVNEDCELRILDFGLARQTDDEMTGYVATRWYRAPEIMLNWMHYNQNVDIWSVGCIMGELLKGKVLFPGSDYIDQLKRIMEVVGTPTPELLKKICSEHAQKYIQSLPFMPQQDLEKIFRGANPLAVDLLKRMLVLDCDGRISASEALSHPYFSQYHDPDDEPEAPLYDQTLESKDRTLEEWKELVFEEVNSFTAPGNKTDSLQVEQ
>SmMAPK14
MSQKERPVFYRQEVNKTIWEVPERYQNLSPVGSGAYGSVCSAYDMKSGLKIAVKKLSRPFQSIIHAKRTYRELRLLKHMKHENVIGLLDAFSPATSLKEFTDVYLVTHLMGADLNNIVKCQKLTDDHVQFLIYQILRGLKYIHSADIIHRDLKPSNLAVNEDCELKVSELLLSFQTTVKSESNHKCEYLQTTLLFFFFSFSPLHFSQILDFGLARHTDDEMTGYVATRWYRAPEIMLNWMHYNMTVDIWSVGCIMAELLTGRTLFPGTDHIDQLKLILMLVGTPEPELLMKISSECARNYISSLPNMPKRNFADVFIGANPQAVDLLEKMLVLDTDKRITAAEALAHSYFAQYHDPDDEPEAEPYDQSFESRELEIEEWKRLTYEEVSNFEPPVFDEDD…
>SmMAPK9
MSEAEGQFYSVQVGDSTFTVLKRYEQLRAIGSGAQGIVCSALDTVLGLPVAVKKLCRPFQNQTHAKRAYRELVLLKCVNHKNIIRLINVFTPQKSLEEFQDLYLVMELMDASLCQVIHMDLDHERMSYLLYQILCGIRHLHSAGIIHRDLKPSNIVVKSDCTLKILDFGLARTACTNFMMTPYVVTRYYRAPEVILGMKYKENVDIWSVGCIMGEMVKGSVIFQGTDHIDQWNKVIEVLGTPSLEFMNRLMETVRNYVMNKPQYPGVSFAELFPDWAFPSDSEHDKLKTGQARDLLSKMLVIDPESRISVEEALNHPYIHVWYDQGEADAPPPQISDKQLEEREHTIEQWKELIYEEVIDWEERNKNGLMKEDYSDVASGSASQSSSANDISSMSTEHT…
>SmMAPK10
MVFMSRHFLYNCSQPILDVKIAFCQGFGKQVDVSYIAQHYNMSKSKVDNQFYSVEVGDSTFTVLKRYQNLKPIGSGAQGIVCAGYDAVLDRNVAIKKLSRPFQNQTHAKRAYRELVLMKCVNHKNIISLLNVFTPQKSLEDFQDVYLAMELMDANLCQVIQMELDHERMSYLLYQMLCGIKHLHSAGIIHRDLKPSNIVVKSDCTLKILDFGLARTAGTSFMMTPYVVTRYYRAPEVILGMGYKENVDIWSVGCIMGEMVRHKILFPGRDYIDQWNKVIEQLGTPALEFMKKLQPTVRNYVENRPKYAGLTFPKLFPDCLFPADSEHNKLKASQARDLLSKMLIIDPAKRISVDEALQHPYINVWYDPAEVEAARDLIQISMPPPQIYDKQLDEREHSI…
>SmMAPK8a
MDCVSGEWKNAEGDYGAYIRTEEKGKEANRTFLDAQKAVIEDFAMNKNKREREFYSLDVGDSTFTVLKRYQNLRPIGSGAQGIVCSAYDQILERNVAIKKLSRPFQNQTHAKRAYRELVLMKCVNHKNIIGLLNVFTPQKSFEEFQDVYLVMELMDANLCQVIQMELDHERLSYLLYQMLCGIKHLHNAGIIHRDLKPSNIVVKSDCTLKILDFGLARTAATGLLMTPYVVTRYYRAPEVILGMGYQSNVDVWSVGCIVAEMIRGSVLFPGTDHIDQWNKVIEQLGTPSQDFLMKLNQSVRTYVENRPRYAGYTFEKLFPDVLFPADSDHNKLKASQARDLLSKMLVIDASKRISVDEALQHPYINVWYDPAEVEAPPPKFADKQLDEREHTVEEWKEL…
>SmMAPK8b
MNRNKREKEYYSIDVGDSTFMVLKRYQNLRPIGSGAQGIVCSAYDHNLERNVAIKKLSRPFQNQTHAKRAYRELVLMKCVNHKNIIGLLNVFTPQKTLEEFQDVYLVMELMDANLCQVIQMELDHERLSYLLYQMLCGIKHLHAAGIIHRDLKPSNIVVKSDCTLKILDFGLARTAATGLLMTPYVVTRYYRAPEVILGMGYQANVDIWAVGCIMAEMVRHKILFPGRDYIDQWNKVIEQLGTPAQEFLMKLNQSVRTYVENRPRYAGYSFEKLFPNVLFPADSEHNKLKASQARDLLSKMLVIDASKRISVDEALQHPYINVWYDPTEVEAPPPAITDKQLDEREHTVDEWKELIYKEVLDWEERTKNGIIRGQPASIGAAVSGSPHQHHPSSSSSSS…
>SmMAPK7
MSTEEGGEGKNCQPVAMSPERMATEKSRENQRRDEATGDSSDTSTTAKNLALLKAHSLDVKFDVGEEYDVIETIGTGAYGVVSSARRRDSGQQVAIKKISNAFEVLTNAKRTLRELKILKHFKHDNIIAIKDILQPNLPHSAFKSVYVVLDLMESDLHQIIHSAQTLTPEHTRYFLYQLLRGLKYVHSANVIHRDLKPSNLLVNENCELKIGDFGMARGLSSHPEESRSFMTEYVATRWYRAPELLLSLNHYSLAIDLWSVGCIFAEMLGRKQLFPGKHYVHQLQLILSVLGTPPEGLIGAIRADRVRSYVQSLPSRSPVPLAKLYPQTEPEALDLLAAMLRFDPRERISVTQALEHPYLAKYHDPDDEPICVPAFDFEFDNLPMNKEQIKEAILMEIQ…
>SmMAPK3
MADSSCTAAVGAAGSNSASAAGAACTVAHDGAPGAAGTKTPSESVKGQLFDVGPRYTNLSYIGEGAYGMVCSASDNVTSSRVAIKKISPFEHQTYCQRTLREIKILLRFHHENIIGINDILRARHIDNMRDVYIVQTLMETDLYKLLKSQRLSNDHVCYFLYQILRGLKYIHSANVLHRDLKPSNLLINTTCDLKICDFGLARIADPEHDHTGFLTEYVATRWYRAPEIMLNSKGYSKSIDIWSVGCILAEMLSNKPIFPGKHYLDQLNHILGILGSPSQEDLNCIINMKARNYLQSLPEKTKIPWEKLFFKADSKALDLLGRMLTFNPIKRISVEEALAHPYLEQYYDPTDEPVAEEPFTFSMELDDLPKEKLKELIYEETARFQETYQGT
>SmMAPK1
MATAAVSAPAGCGPSPGSGAGAELVRGQAFDVGPRYSNLSYIGEGAYGMVCSAYDRDNKVRVAIKKISPFEHQTYCQRTLREIKILLRFKHENIIGINDIIRTPTIDQMKDVYIVQDLMETDLYKLLKTQHLSNDHICYFLYQILRGLKYIHSANVLHRDLKPSNLLLNTTCDLKICDFGLARVADPDHDHTGFLTEYVATRWYRAPEIMLNSKGYTKSIDIWSVGCILAEMLSNRPIFPGKHYLDQLNHILGILGSPSQEDLNCIINIKARNYLLSLPLRCKVPWNRLFPNADPKALDLLDKMLTFNPHKRIEVEEALAHPYLEQYYDPTDEPVAEAPFKFDMELDDLPKEKLKELIFEETARFQMAFRS
>SmMAPK15
MSKKYESTNVSEVEGHISQKYEIKRRLGKGAYGIVWKAVDRQTGEIVAVKKIFDAFRNRTDAQRTFREIMLLQEFGDHPNIVKLLNVIRAQNDKDIYLIFEYMDSDLHAVIKKGTLLKDIHKRYVMYQLFKAIKYLHSGNVIHRDQKPSNVLLDTDCVVKLCDFGLARSLNQIQEDSGNPALTEYVATRWYRAPEILLGSTRYTKGVDMWSLGCILGEMLLGKAVFPGTSTINQIEKIMSAIPHPSPEDILAIKSEYGSSVIQRMLLKPQVPLEDLLQPSMPPDALDLLRGLLVFNPDKRLTAEQALQHPYVARFHNPAKEPSFYYDVVLPVEDDVQLSVVQYRNKLYEMILERRTNQGMLRLIHPKDRDCVSSGEKPSVNVKVEKGPVEVNGDGDVEG…
>SmMAPK6
MAEKFESLMNIHGFDLGSRYMDLKPLGYGGNGLVFSAVDTDCDKRVAVKKIILTDPQSVKHALREIKIIRRLDHDNIVKVFETLGPNGRTLTEDVVSLTEVNSVYIVQEYMETDLCQLLERGLLSEGHARLFMYQFLRGLKYIHSANVLHRDLKPANLFVNTEDLVLKIGDFGLARIMDPHYSHKGHLSEGLVTKWYRSPRLLLSPNNYTKAIDMWAAGCIFAEMLTGKTLFAGAHELEQMQLILETIPVLREEDRQELHSVIPVFIRNDMSKPHTPLAKLLPDVSPQALDFLEKILTFNPMDRLTAEEALAHPYMADYSFPLDEPVSLHPFHIEDEVDDILLMDQSHSHTWDRYHESQLSEADWHLHSTHDPDEVQVDPRALSDVTDEEEVQVDPRKY…
>SmMAPK4
MARQDTPPFLHGFDLSGHFVDPRPLGTGVTGLVLSAVDQRNGRRVAIKKLVMRDTVTVKHALREVKITHRLSHENVVQVHEVLAPHGRPLPRDPRQLSALYIVQECMETDLARLLEQGPLPTGHATLLFYQLLRGLKFIHSANVLHRDLKPANIFINTDQLLLKVGDFGLARIVDPHYSHKGYLSEGLVTKWYCSPRLLLSPNNYTKAIDMWAAGCILAEMLTGRMLFAGAHELEQMQLILDTVPVLREEDRQDLLQVMPSYVSRGWRVKKPFSELLPEVDAQAVDFLERILTFNPMDRLTAEAALSHPFLQQYSCPEDEPTSSHPFHIEDELEDNLITEQSLSSSQASSIHWDRYENSLSTDVCWQQAGGRCRCMPPGHVTSDLGDTTEDEEVQRDPR…
